# Supplementary material
Source: PubMed Central journal article supplement (PMC2896771)
Supplement: mmc1.pdf [file mmc1.pdf]

## Supplemental Data

### **IRF4 Variants Have Age-Specific Effects on Nevus Count and Predispose to Melanoma**

David L. Duffy, Mark M. Iles, Dan Glass, Gu Zhu, Jennifer H. Barrett, Veronica Höiom, Zhen Z. Zhao, Richard A. Sturm, Nicole Soranzo, Chris Hammond, Marina Kvaskoff, David C. Whiteman, Massimo Mangino, Johan Hansson, Julia A Newton-Bishop, GenoMEL, Veronique Bataille, Nicholas K. Hayward, Nicholas G. Martin, D. Timothy Bishop, Timothy D. Spector, and Grant W. Montgomery

#### **Supplemental Acknowledgments**

For the Australian Studies we thank Adele Green, Joanne Aitken, Anjali Henders, Megan Campbell, Mitchell Stark, Amanda Baxter, Monica de Nooyer, Isabel Gardner, Dixie Statham, Barbara Haddon, Jane Palmer, Lisa Bardsley, Sara Smith, David Smyth, and Harry Beeby for their input into project management, sample processing, database, and questionnaire development. We are grateful to all the participants of the BTNS and Q-MEGA as well as the research interviewers and examiners for these studies. For genotyping of TwinsUK samples, we thank the staff from the Genotyping Facilities at the Wellcome Trust Sanger Institute. We would also like to thank all the nurses and research assistants who collected the skin data for the TwinsUK samples, including U. Perks and G. Clement; Bernet Keto, Pirro Hysi, and Emad Qweitin, who helped with data; as well as the volunteer twins who gave up their time. We thank Annika Lindblom for providing control samples for the Swedish studies.

#### **The GenoMEL Collaboration**

**Leeds:** Prof Julia A Newton Bishop, Paul Affleck, Dr Jennifer H Barrett, Prof D Timothy Bishop, Jane Harrison, Dr Mark M Iles, Dr Juliette Randerson-Moor, Dr Mark Harland, John C Taylor, Linda Whittaker, Kairen Kukalich, Susan Leake, Birute Karpavicius, Sue Haynes, Tricia Mack, May Chan, Yvonne Taylor.

**Australian Melanoma Family Study:** Graham J. Mann, John L. Hopper, Joanne F. Aitken, Bruce K. Armstrong, Graham G. Giles, Richard F. Kefford, Anne Cust, Mark Jenkins

**Barcelona: The participants of GenoMEL in Barcelona:** Paula Aguilera, Celia Badenas, Cristina Carrera, Remedios Cervera, Francisco Cuellar, Daniel Gabriel, Melinda Gonzalez, Pablo Iglesias, Josep Malvey, Rosa Marti-Laborda, Montse Mila, Zighe Ogbah, Joan-Anton Puig Butille, Susana Puig and **Other members of the Melanoma Unit:** Ana Ancero, Pedro Arguís, Antonio Campo, Teresa Castel, Carlos Conill, Ramon Rull, Marcelo Sánchez, Sergi Vidal-Sicart, Antonio Vilalta, Ramon Vilella.

**Brisbane: The Queensland study of Melanoma: (Q-MEGA) Principal Investigators are:** Nicholas G. Martin, Grant W. Montgomery, David Duffy, David Whiteman, Stuart MacGregor, Nicholas K. Hayward. **The Australian Cancer Study (ACS) Principal Investigators are:** David Whiteman, Penny Webb, Adele Green, Peter Parsons, David Purdie, Nicholas Hayward.

**Emilia-Romagna:** Maria Teresa Landi, Donato Calista, Giorgio Landi, Paola Minghetti, Pier Alberto Berazzi

**Genoa:** Giovanna Bianchi-Scarrà, Paola Ghiorzo, Lorenza Pastorino, William Bruno, Linda Battistuzzi, Sara Giori, Sara Gargiulo, Sabina Nasti, Paola Queirolo

**Glasgow:** Rona Mackie, Julie Lang

**Leiden: Department of Dermatology, Leiden University Medical Center:** Nelleke A Gruis, Frans A van Nieuwpoort, Coby Out, Clasine van der Drift, Wilma Bergman, Jasper van der Rhee, Geeske de Klooe, Liesbeth Koopmans, Nicole Kukutsch, Jan Nico Bouwes Bavinck. **Department of Clinical Genetics, Centre of Human and Clinical Genetics, Leiden University Medical Center:** Bert Bakker, Marian Weiss, Jeanet ter Huurne, Anne-Wil Stelloo, Tim Segboer. **Department of Dermatology, Haga Hospital, The Hague:** Han van der Rhee. **Department of Dermatology, Reinier de Graaf Groep, Delft:** Marcel Bekkenk. **Department of Dermatology, Sint Franciscus Gasthuis, Rotterdam:** Dyon Snels, Marinus van Praag. **Department of Dermatology, Ghent University Hospital, Ghent, Belgium:** Lieve Brochez & colleagues. **Department of Dermatology, St. Radboud University Medical**

**Center, Nijmegen:** Rianne Gerritsen & colleagues. **Department of Dermatology, Rijnland Hospital, Leiderdorp:** Marianne Crijs & colleagues. **Dutch patient organization, Stichting Melanoom, Purmerend. The Netherlands Foundation for the detection of Hereditary Tumors, Leiden:** Hans Vasen.

**Lund: Lund Melanoma Study Group:** Håkan Olsson, Christian Ingvar, Göran Jönsson, Åke Borg, Anna Måsbäck, Lotta Lundgren, Katja Baeckenhorn, Kari Nielsen, Anita Schmidt Casslén.

**Paris:** Marie-Françoise Avril, Brigitte Bressac-de Paillerets, Valérie Chaudru, Nicolas Chateigner, Eve Corda, Fabienne Lesueur, Mahaut de Lichy, Eve Maubec, Hamida Mohamdi, Molf Moullec, Luc Thomas, Gilbert Lenoir, Florence Demenais and the French Family Study Group including the following Oncogeneticists and Dermatologists: Pascale Andry-Benzaquen, Bertrand Bachollet, Frédéric Bérard, Pascaline Berthet, Françoise Boitier, Valérie Bonadona, Jean-Louis Bonafé, Jean-Marie Bonnetblanc, Frédéric Cambazard, Olivier Caron, Frédéric Caux, Jacqueline Chevrant-Breton, Agnès Chompret (deceased), Stéphane Dalle, Liliane Demange, Olivier Dereure, Martin-Xavier Doré, Marie-Sylvie Doutre, Catherine Dugast, Laurence Faivre, Florent Grange, Philippe Humbert, Pascal Joly, Delphine Kerob, Christine Lasset, Dominique Leroux, Julien Levang, Dan Lipsker, Sandrine Mansard, Ludovic Martin, Tanguy Martin-Denavit, Christine Mateus, Jean-Loïc Michel, Patrice Morel, Laurence Olivier-Faivre, Jean-Luc Perrot, Caroline Robert, Sandra Ronger-Savle, Bruno Sassolas, Pierre Souteyrand, Dominique Stoppa-Lyonnet, Pierre Vabres, Eva Wierzbicka.

**Pennsylvania:** David Elder, Peter Kanetsky, Patricia Van Belle, Michael Ming

**Poland:** Tadeusz Dębniak, Jan Lubiński, Aneta Mirecka, Sławomir Ertmański

**Slovenia:** Srdjan Novakovic, Marko Hocevar, Barbara Peric, Petra Cerkovnik

**Stockholm:** Veronica Höiom, Johan Hansson, Diana Linden, Rainer Tuominen

**Sydney:** Graham J. Mann, Richard F. Kefford, Helen Schmid, Elizabeth A. Holland.

**Tel Aviv:** Professor Esther Azizi, Gilli Galore-Haskel, Prof Eitan Friedman, Dr Orna Baron-Epel, Dr Alon Scope, Dr Felix Pavlotsky, Dr Emanuel Yakobson, Irit Cohen-Manheim, Yael Laitman, Roni Ilgrom, Iris Shimoni, Evgeniya Kozlova

**Analysis Group:** Jennifer H Barrett, D Timothy Bishop, Eve Corda, Florence Demenais, Elizabeth Gillanders, Alisa Goldstein, Mark M Iles, Peter A. Kanetsky, John Taylor

Figure S1. Quantile-Quantile Plot for the Genome-wide Association Scan for Total Nevus Count in Queensland Adolescent Twins

The measured genotype analysis was performed as a mixed-model score test using the MERLIN package (“merlin –fastassoc”). The grey colored region represents an approximate 95% confidence envelope (that does not adjust for inter-SNP linkage disequilibrium). Note that lambda is 1.004, despite the large number of associated SNPs.

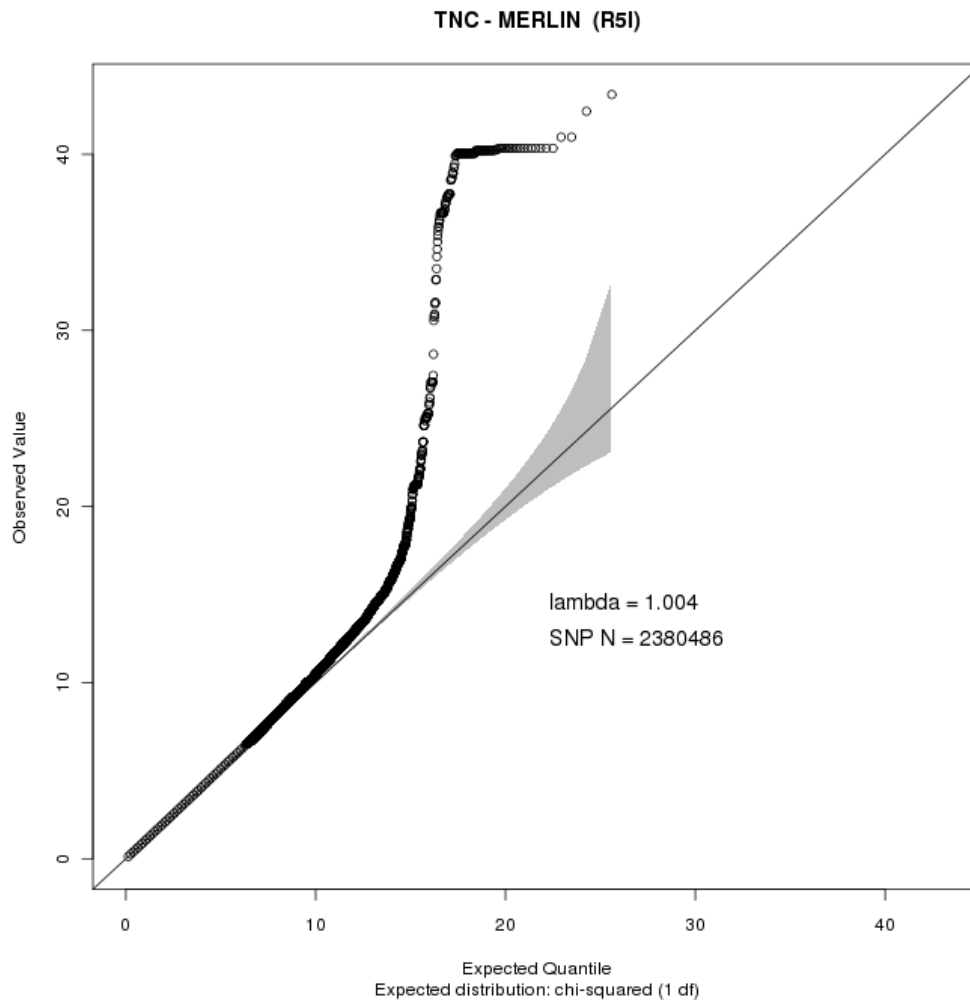

*Figure S2.* Nevus Counts in Queensland Adolescent Twins, UK Adolescent (Leeds) and Adult (Twins UK) Twins, UK Unrelated Controls and Melanoma Cases (Leeds) by Age Band and rs12203592 Genotype

A model including a restricted cubic spline fit for age concluded that the three UK non-melanoma-case samples did not differ significantly from one another ( $P=0.94$ ), so we present data for melanoma cases in the upper row of plots, the Queensland twin data in the first two plots of the lower row, and the combined data from the UK non-cases in the remaining plots. The notches in the bars represent approximate 95% confidence intervals on the medians, and in some cases exceed the interquartile range.

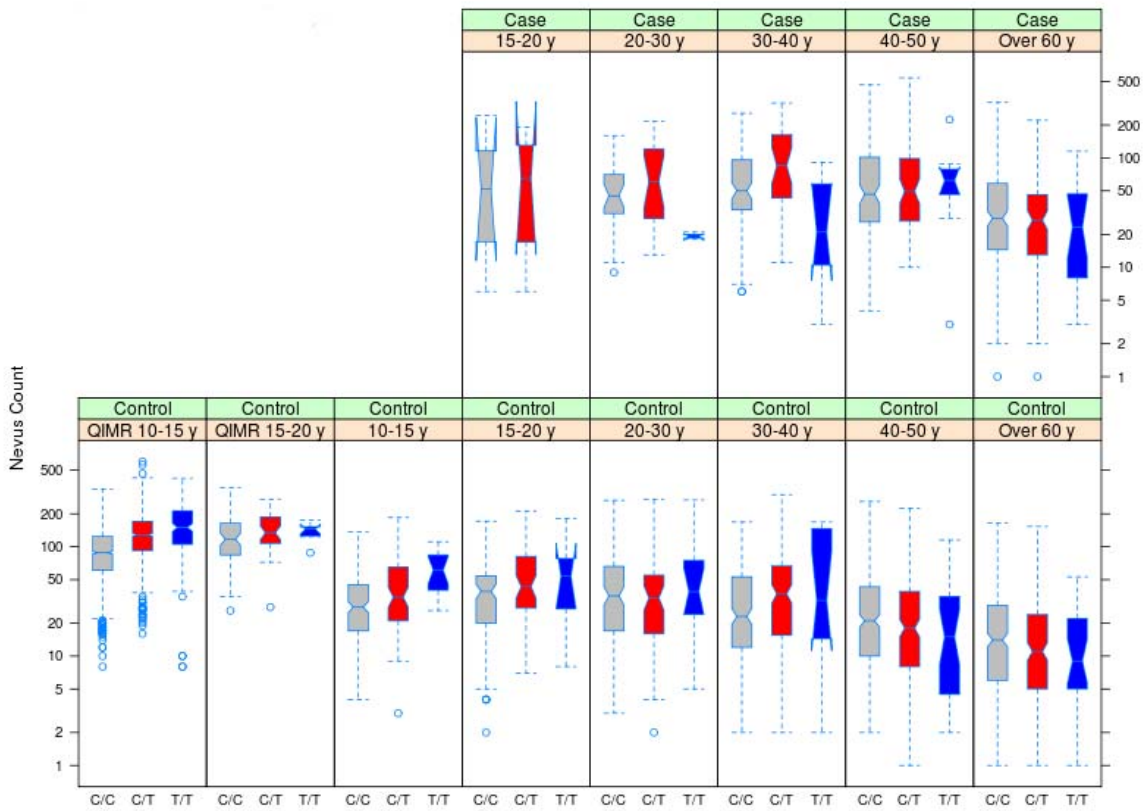

Figure S3. Analysis of Melanoma on the Trunk for Case-Control Data from Sweden, Leeds and Brisbane for rs12203592

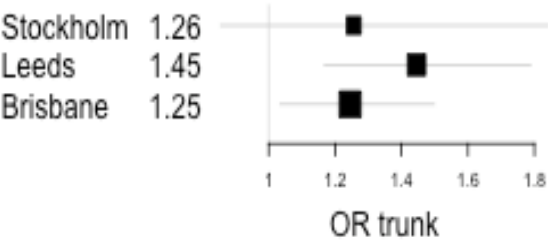

*Table S1. Risk of Melanoma on Different Body Sites versus rs12203592 Genotype in Leeds, QIMR, and Stockholm Case-Control Comparisons*

| Study     | Tumour Site* | N    | OR (C allele)     |
|-----------|--------------|------|-------------------|
| Leeds     | Head         | 151  | 1.05 (0.77- 1.43) |
|           | Limbs        | 543  | 1.20 (0.97-1.48)  |
|           | Trunk        | 404  | 1.53 (1.21-1.94)  |
|           | Other        | 94   | 1.04 (0.72-1.51)  |
| QIMR      | Head         | 169  | 1.12 (0.85-1.46)  |
|           | Limbs        | 394  | 1.05 (0.87-1.26)  |
|           | Trunk        | 486  | 1.22 (1.03-1.48)  |
|           | Other        | 356  | 1.11 (0.91-1.35)  |
| Stockholm | Head         | 88   | 0.63 (0.38-1.05)  |
|           | Limbs        | 330  | 0.95 (0.66-1.36)  |
|           | Trunk        | 349  | 1.26 (0.86-1.85)  |
|           | Other        | 8    | 0.57 (0.13-2.45)  |
| Overall** | Head         | 408  | 1.00 (0.83-1.21)  |
|           | Limbs        | 1267 | 1.09 (0.96-1.23)  |
|           | Trunk        | 1239 | 1.33 (1.16-1.52)  |
|           | Other        | 458  | 1.08 (0.91-1.28)  |

\* Head (site codes C440-C444), trunk (C445), limbs (C446-C447), Other (C449, C809, unspecified).

\*\* Multinomial regression stratifying on ethnicity/study.
